# Supplementary material
Source: PubMed Central journal article supplement (PMC6001382)
Supplement: Supp_Table1.pdf [file Supp_Table1.pdf]

**eTable 1.** Average annual percent change (AAPC) in obesity prevalence for specific time periods<sup>a</sup> by child’s age: Los Angeles County, 2003-2014.

|               | Average Annual Percent Change <sup>b</sup> (95% CI) |                 |                          |                       | Comparisons <sup>c,d</sup> |
|---------------|-----------------------------------------------------|-----------------|--------------------------|-----------------------|----------------------------|
|               | 2003-05                                             | 2005-10         | 2010-14                  | 2003-14               |                            |
| 2-4-year-olds | <b>10.9 (6.9, 13.7)</b>                             | 0.9 (-0.1, 1.7) | <b>-2.8 (-3.8, -1.7)</b> | <b>1.3 (0.8, 1.7)</b> |                            |
| 2-year-olds   | <b>13.3 (7.7, 18.4)</b>                             | 1.4 (-0.1, 3.0) | <b>-3.9 (-5.7, -2.2)</b> | <b>1.5 (0.6, 2.2)</b> | e                          |
| 3-year-olds   | <b>10.8 (6.5, 14.1)</b>                             | 0.6 (-0.3, 1.6) | <b>-1.8 (-3.3, -0.9)</b> | <b>1.5 (0.9, 1.9)</b> |                            |
| 4-year-olds   | <b>7.6 (5.0, 9.5)</b>                               | 0.4 (-0.3, 1.0) | <b>-1.8 (-2.6, -1.0)</b> | <b>0.8 (0.5, 1.2)</b> | e                          |

Obesity is having a BMI  $\geq$  95<sup>th</sup> percentile of CDC’s gender- and age-specific growth reference values.

<sup>a</sup>Time periods based on the inflection years of the trend in obesity prevalence for all children.

<sup>b</sup>Average Annual Percent Change based on log-linear regression model. **Bold** AAPC (95% CI) represent statistically significant increases or decreases over the specified time period.

<sup>c</sup>p-value for test of parallelism to determine whether two secular trends are parallel, ie have common slopes. Identical lower-case letters refer to significantly different secular trends at  $p < 0.05$ . No lower-case letter means that the trends are parallel.

<sup>d</sup>p-value for test of coincidence to determine whether two secular trends are identical. Identical capital letters refer to whether two secular trends are not significantly different at  $p < 0.05$ .
