# Supplementary material
Source: PubMed Central journal article supplement (PMC6001382)
Supplement: Supp_Table2.pdf [file Supp_Table2.pdf]

**eTable 2.** Average annual percent change (AAPC) in obesity prevalence for specific time periods<sup>a</sup> by household income and child’s age: Los Angeles County, 2003-2014.

|                    | Average Annual Percent Change <sup>b</sup> (95% CI) |                       |                          |                       | Comparisons <sup>c,d</sup> |
|--------------------|-----------------------------------------------------|-----------------------|--------------------------|-----------------------|----------------------------|
|                    | 2003-05                                             | 2005-10               | 2010-14                  | 2003-14               |                            |
| <b>2-year-olds</b> |                                                     |                       |                          |                       |                            |
| ≤ 50% FPL          | <b>10.7 (5.5, 19.1)</b>                             | 0.8 (-1.5, 2.2)       | <b>-1.6 (-3.1, 0.5)</b>  | <b>1.6 (0.7, 2.6)</b> | A                          |
| 50.1-100.0% FPL    | <b>8.0 (3.8, 16.7)</b>                              | 1.8 (-0.8, 3.4)       | <b>-2.2 (-4.8, -0.6)</b> | <b>1.4 (0.2, 2.5)</b> | A                          |
| 100.1-133.0% FPL   | <b>8.2 (4.6, 14.3)</b>                              | 1.5 (-0.2, 2.8)       | <b>-2.8 (-4.9, -1.1)</b> | 1.1 (-0.1, 2.1)       |                            |
| 133.1-185.0% FPL   | <b>14.8 (9.9, 18.7)</b>                             | 0.4 (-1.0, 1.6)       | <b>-4.2 (-5.9, -2.3)</b> | <b>1.2 (0.4, 1.8)</b> |                            |
| <b>3-year-olds</b> |                                                     |                       |                          |                       |                            |
| ≤ 50% FPL          | <b>11.5 (9.0, 13.5)</b>                             | 0.3 (-0.2, 1.1)       | <b>-1.9 (-2.7, -1.2)</b> | <b>1.4 (1.1, 1.7)</b> | A                          |
| 50.1-100.0% FPL    | <b>12.0 (6.9, 16.3)</b>                             | 0.6 (-0.3, 2.0)       | <b>-1.8 (-3.5, -0.6)</b> | <b>1.7 (1.0, 2.3)</b> | A, B                       |
| 100.1-133.0% FPL   | <b>6.1 (2.9, 11.3)</b>                              | 1.0 (-0.7, 2.2)       | <b>-2.2 (-4.2, -0.9)</b> | 0.7 (-0.2, 1.6)       | B, C                       |
| 133.1-185.0% FPL   | <b>7.5 (4.9, 12.2)</b>                              | 0.9 (-0.4, 1.9)       | <b>-4.5 (-6.1, -2.9)</b> | 0.1 (-0.6, 0.7)       | C                          |
| <b>4-year-olds</b> |                                                     |                       |                          |                       |                            |
| ≤ 50% FPL          | <b>8.0 (4.8, 10.2)</b>                              | 0.3 (-0.5, 1.0)       | <b>-1.8 (-2.6, -0.8)</b> | <b>0.9 (0.4, 1.2)</b> | A                          |
| 50.1-100.0% FPL    | <b>7.0 (4.1, 9.1)</b>                               | <b>0.7 (0.2, 1.5)</b> | <b>-1.3 (-2.3, -0.6)</b> | <b>1.1 (0.7, 1.4)</b> | e, f, A                    |
| 100.1-133.0% FPL   | <b>3.8 (1.1, 9.5)</b>                               | 0.3 (-1.5, 1.8)       | <b>-2.0 (-4.3, -0.8)</b> | 0.1 (-0.8, 0.8)       | e, B                       |
| 133.1-185.0% FPL   | <b>9.0 (0.8, 15.3)</b>                              | -1.4 (-2.5, 1.3)      | <b>-1.4 (-4.3, -0.4)</b> | 0.4 (-1.1, 1.4)       | f, B                       |

Obesity is having a BMI ≥ 95<sup>th</sup> percentile of CDC’s gender- and age-specific growth reference values.

FPL = Federal poverty level.

<sup>a</sup>Time periods based on the inflection years of the trend in obesity prevalence for all children.

<sup>b</sup>Average Annual Percent Change based on log-linear regression model. **Bold** AAPC (95% CI) represent statistically significant increases or decreases over the specified time period.

<sup>c</sup>p-value for test of parallelism to determine whether two secular trends are parallel, ie have common slopes. Identical lower-case letters refer to significantly different secular trends at p < 0.05. No lower-case letter means that the trends are parallel.

<sup>d</sup>p-value for test of coincidence to determine whether two secular trends are identical. Identical capital letters refer to whether two secular trends are not significantly different at p < 0.05.
