# Supplementary material
Source: PubMed Central journal article supplement (PMC6001382)
Supplement: Supp_Table3.pdf [file Supp_Table3.pdf]

**eTable 3.** Average annual percent change (AAPC) in obesity prevalence for specific time periods<sup>a</sup> by household education and child’s age: Los Angeles County, 2003-2014.

|                    | Average Annual Percent Change <sup>b</sup> (95% CI) |                       |                           |                       | Comparisons <sup>c,d</sup> |
|--------------------|-----------------------------------------------------|-----------------------|---------------------------|-----------------------|----------------------------|
|                    | 2003-05                                             | 2005-10               | 2010-14                   | 2003-14               |                            |
| <b>2-year-olds</b> |                                                     |                       |                           |                       |                            |
| < High school      | <b>10.9 (5.4, 19.5)</b>                             | 1.1 (-1.1, 2.6)       | <b>-1.2 (-3.0, 0.1)</b>   | <b>2.0 (0.9, 3.0)</b> |                            |
| High school        | <b>7.6 (4.0, 14.2)</b>                              | <b>1.9 (0.1, 3.1)</b> | <b>-1.7 (-3.4, -0.3)</b>  | <b>1.6 (0.6, 2.6)</b> |                            |
| Some college       | <b>15.7 (9.6, 20.4)</b>                             | <b>1.6 (0.3, 3.1)</b> | <b>-4.3 (-5.6, -2.8)</b>  | <b>1.8 (1.2, 2.4)</b> |                            |
| College or more    | <b>5.3 (2.1, 13.5)</b>                              | <b>3.0 (0.4, 5.9)</b> | <b>-5.5 (-10.0, -2.3)</b> | 0.2 (-1.5, 2.0)       |                            |
| <b>3-year-olds</b> |                                                     |                       |                           |                       |                            |
| < High school      | <b>10.9 (6.8, 14.1)</b>                             | 0.6 (-0.2, 1.6)       | <b>-1.5 (-3.0, -0.6)</b>  | <b>1.6 (1.0, 2.0)</b> |                            |
| High school        | <b>10.3 (6.3, 13.6)</b>                             | <b>1.2 (0.4, 2.3)</b> | <b>-1.5 (-2.7, -0.8)</b>  | <b>1.8 (1.3, 2.2)</b> |                            |
| Some college       | <b>9.6 (5.3, 16.7)</b>                              | 1.5 (-0.5, 3.0)       | <b>-4.5 (-6.5, -2.5)</b>  | 0.7 (-0.3, 1.7)       |                            |
| College or more    | 0.4 (-1.7, 2.5)                                     | 0.4 (-1.7, 2.5)       | 0.4 (-1.7, 2.5)           | 0.4 (-1.7, 2.5)       |                            |
| <b>4-year-olds</b> |                                                     |                       |                           |                       |                            |
| < High school      | <b>9.1 (4.5, 12.4)</b>                              | -0.4 (-0.9, 0.9)      | -0.4 (-1.1, 0.1)          | <b>1.3 (0.7, 1.8)</b> |                            |
| High school        | <b>6.8 (3.4, 9.7)</b>                               | 0.8 (-0.0, 1.8)       | <b>-1.5 (-2.6, -0.4)</b>  | <b>1.0 (0.5, 1.5)</b> |                            |
| Some college       | <b>3.8 (1.6, 9.4)</b>                               | 1.6 (-0.1, 3.0)       | <b>-1.6 (-3.9, -0.2)</b>  | 0.8 (-0.1, 1.7)       |                            |
| College or more    | -0.5 (-3.2, 2.0)                                    | -0.5 (-3.2, 2.0)      | -0.5 (-3.2, 2.0)          | -0.5 (-3.2, 2.0)      |                            |

Obesity is having a BMI  $\geq$  95<sup>th</sup> percentile of CDC’s gender- and age-specific growth reference values.

<sup>a</sup>Time periods based on the inflection years of the trend in obesity prevalence for all children.

<sup>b</sup>Average Annual Percent Change based on log-linear regression model. **Bold** AAPC (95% CI) represent statistically significant increases or decreases over the specified time period.

<sup>c</sup>p-value for test of parallelism to determine whether two secular trends are parallel, ie have common slopes. Identical lower-case letters refer to significantly different secular trends at p < 0.05. No lower-case letter means that the trends are parallel.

<sup>d</sup>p-value for test of coincidence to determine whether two secular trends are identical. Identical capital letters refer to whether two secular trends are not significantly different at p < 0.05.
