# Supplementary material
Source: PubMed Central journal article supplement (PMC6001382)
Supplement: Supp_Table4.pdf [file Supp_Table4.pdf]

**eTable 4.** Average annual percent change (AAPC) in obesity prevalence for specific time periods<sup>a</sup> by neighborhood median household income and child's age: Los Angeles County, 2003-2014.

|                    | Average Annual Percent Change <sup>b</sup> (95% CI) |                       |                          |                       | Comparisons <sup>c,d</sup> |
|--------------------|-----------------------------------------------------|-----------------------|--------------------------|-----------------------|----------------------------|
|                    | 2003-05                                             | 2005-10               | 2010-14                  | 2003-14               |                            |
| <b>2-year-olds</b> |                                                     |                       |                          |                       |                            |
| ≤ \$ 32,738        | <b>8.4 (4.9, 13.8)</b>                              | <b>1.7 (0.3, 2.9)</b> | <b>-2.5 (-4.3, -1.1)</b> | <b>1.3 (0.3, 2.3)</b> | A                          |
| \$32,739 - 40,278  | <b>8.1 (3.8, 18.1)</b>                              | 1.9 (-1.1, 3.9)       | <b>-2.1 (-5.4, -0.4)</b> | <b>1.5 (0.1, 2.7)</b> | A                          |
| \$40,279 - 51,534  | <b>14.0 (7.2, 20.1)</b>                             | 1.5 (-0.2, 3.3)       | <b>-3.5 (-5.7, -1.4)</b> | <b>1.8 (0.7, 2.7)</b> |                            |
| ≥ \$51,535         | <b>12.7 (6.6, 17.6)</b>                             | 1.1 (-0.4, 2.6)       | <b>-3.5 (-5.3, -1.6)</b> | <b>1.4 (0.5, 2.1)</b> |                            |
| <b>3-year-olds</b> |                                                     |                       |                          |                       |                            |
| ≤ \$ 32,738        | <b>10.2 (6.6, 13.0)</b>                             | <b>0.8 (0.2, 1.8)</b> | <b>-2.0 (-3.1, -1.3)</b> | <b>1.4 (0.9, 1.8)</b> |                            |
| \$32,739 - 40,278  | <b>14.1 (10.6, 16.6)</b>                            | 0.4 (-0.4, 1.3)       | <b>-3.3 (-4.4, -2.2)</b> | <b>1.3 (0.8, 1.8)</b> | e                          |
| \$40,279 - 51,534  | <b>12.3 (7.0, 15.9)</b>                             | 0.7 (-0.3, 2.1)       | <b>-2.5 (-4.1, -0.9)</b> | <b>1.5 (0.8, 2.2)</b> | e                          |
| ≥ \$51,535         | <b>5.4 (2.6, 10.9)</b>                              | 1.3 (-0.3, 2.3)       | -1.3 (-3.0, -0.3)        | <b>1.1 (0.3, 1.8)</b> |                            |
| <b>4-year-olds</b> |                                                     |                       |                          |                       |                            |
| ≤ \$ 32,738        | <b>8.6 (4.6, 12.1)</b>                              | 0.6 (-0.4, 1.7)       | <b>-2.2 (-3.6, -0.8)</b> | <b>1.0 (0.3, 1.5)</b> | A                          |
| \$32,739 - 40,278  | <b>9.5 (6.1, 11.9)</b>                              | 0.1 (-0.5, 1.0)       | <b>-1.7 (-2.8, -1.0)</b> | <b>1.1 (0.7, 1.4)</b> | A                          |
| \$40,279 - 51,534  | 0.3 (-0.7, 1.3)                                     | 0.3 (-0.7, 1.3)       | 0.3 (-0.7, 1.3)          | 0.3 (-0.7, 1.3)       |                            |
| ≥ \$51,535         | <b>3.9 (1.9, 8.0)</b>                               | 0.9 (-0.4, 1.8)       | <b>-1.0 (-2.2, -0.2)</b> | <b>0.8 (0.2, 1.3)</b> |                            |

Obesity is having a BMI ≥ 95<sup>th</sup> percentile of CDC's gender- and age-specific growth reference values.

<sup>a</sup>Time periods based on the inflection years of the trend in obesity prevalence for all children.

<sup>b</sup>Average Annual Percent Change based on log-linear regression model. **Bold** AAPC (95% CI) represent statistically significant increases or decreases over the specified time period.

<sup>c</sup>p-value for test of parallelism to determine whether two secular trends are parallel, ie have common slopes. Identical lower-case letters refer to significantly different secular trends at p < 0.05. No lower-case letter means that the trends are parallel.

<sup>d</sup>p-value for test of coincidence to determine whether two secular trends are identical. Identical capital letters refer to whether two secular trends are not significantly different at p < 0.05.
