# Supplementary material
Source: PubMed Central journal article supplement (PMC6001382)
Supplement: Supp_Tables1-4.pdf [file Supp_Tables1-4.pdf]

**eTable 1.** Average annual percent change (AAPC) in obesity prevalence for specific time periods<sup>a</sup> by child’s age: Los Angeles County, 2003-2014.

|               | Average Annual Percent Change <sup>b</sup> (95% CI) |                 |                          |                       | Comparisons <sup>c,d</sup> |
|---------------|-----------------------------------------------------|-----------------|--------------------------|-----------------------|----------------------------|
|               | 2003-05                                             | 2005-10         | 2010-14                  | 2003-14               |                            |
| 2-4-year-olds | <b>10.9 (6.9, 13.7)</b>                             | 0.9 (-0.1, 1.7) | <b>-2.8 (-3.8, -1.7)</b> | <b>1.3 (0.8, 1.7)</b> |                            |
| 2-year-olds   | <b>13.3 (7.7, 18.4)</b>                             | 1.4 (-0.1, 3.0) | <b>-3.9 (-5.7, -2.2)</b> | <b>1.5 (0.6, 2.2)</b> | e                          |
| 3-year-olds   | <b>10.8 (6.5, 14.1)</b>                             | 0.6 (-0.3, 1.6) | <b>-1.8 (-3.3, -0.9)</b> | <b>1.5 (0.9, 1.9)</b> |                            |
| 4-year-olds   | <b>7.6 (5.0, 9.5)</b>                               | 0.4 (-0.3, 1.0) | <b>-1.8 (-2.6, -1.0)</b> | <b>0.8 (0.5, 1.2)</b> | e                          |

Obesity is having a BMI  $\geq$  95<sup>th</sup> percentile of CDC’s gender- and age-specific growth reference values.

<sup>a</sup>Time periods based on the inflection years of the trend in obesity prevalence for all children.

<sup>b</sup>Average Annual Percent Change based on log-linear regression model. **Bold** AAPC (95% CI) represent statistically significant increases or decreases over the specified time period.

<sup>c</sup>p-value for test of parallelism to determine whether two secular trends are parallel, ie have common slopes. Identical lower-case letters refer to significantly different secular trends at  $p < 0.05$ . No lower-case letter means that the trends are parallel.

<sup>d</sup>p-value for test of coincidence to determine whether two secular trends are identical. Identical capital letters refer to whether two secular trends are not significantly different at  $p < 0.05$ .

**eTable 2.** Average annual percent change (AAPC) in obesity prevalence for specific time periods<sup>a</sup> by household income and child's age: Los Angeles County, 2003-2014.

|                    | Average Annual Percent Change <sup>b</sup> (95% CI) |                       |                          |                       | Comparisons <sup>c,d</sup> |
|--------------------|-----------------------------------------------------|-----------------------|--------------------------|-----------------------|----------------------------|
|                    | 2003-05                                             | 2005-10               | 2010-14                  | 2003-14               |                            |
| <b>2-year-olds</b> |                                                     |                       |                          |                       |                            |
| ≤ 50% FPL          | <b>10.7 (5.5, 19.1)</b>                             | 0.8 (-1.5, 2.2)       | <b>-1.6 (-3.1, 0.5)</b>  | <b>1.6 (0.7, 2.6)</b> | A                          |
| 50.1-100.0% FPL    | <b>8.0 (3.8, 16.7)</b>                              | 1.8 (-0.8, 3.4)       | <b>-2.2 (-4.8, -0.6)</b> | <b>1.4 (0.2, 2.5)</b> | A                          |
| 100.1-133.0% FPL   | <b>8.2 (4.6, 14.3)</b>                              | 1.5 (-0.2, 2.8)       | <b>-2.8 (-4.9, -1.1)</b> | 1.1 (-0.1, 2.1)       |                            |
| 133.1-185.0% FPL   | <b>14.8 (9.9, 18.7)</b>                             | 0.4 (-1.0, 1.6)       | <b>-4.2 (-5.9, -2.3)</b> | <b>1.2 (0.4, 1.8)</b> |                            |
| <b>3-year-olds</b> |                                                     |                       |                          |                       |                            |
| ≤ 50% FPL          | <b>11.5 (9.0, 13.5)</b>                             | 0.3 (-0.2, 1.1)       | <b>-1.9 (-2.7, -1.2)</b> | <b>1.4 (1.1, 1.7)</b> | A                          |
| 50.1-100.0% FPL    | <b>12.0 (6.9, 16.3)</b>                             | 0.6 (-0.3, 2.0)       | <b>-1.8 (-3.5, -0.6)</b> | <b>1.7 (1.0, 2.3)</b> | A, B                       |
| 100.1-133.0% FPL   | <b>6.1 (2.9, 11.3)</b>                              | 1.0 (-0.7, 2.2)       | <b>-2.2 (-4.2, -0.9)</b> | 0.7 (-0.2, 1.6)       | B, C                       |
| 133.1-185.0% FPL   | <b>7.5 (4.9, 12.2)</b>                              | 0.9 (-0.4, 1.9)       | <b>-4.5 (-6.1, -2.9)</b> | 0.1 (-0.6, 0.7)       | C                          |
| <b>4-year-olds</b> |                                                     |                       |                          |                       |                            |
| ≤ 50% FPL          | <b>8.0 (4.8, 10.2)</b>                              | 0.3 (-0.5, 1.0)       | <b>-1.8 (-2.6, -0.8)</b> | <b>0.9 (0.4, 1.2)</b> | A                          |
| 50.1-100.0% FPL    | <b>7.0 (4.1, 9.1)</b>                               | <b>0.7 (0.2, 1.5)</b> | <b>-1.3 (-2.3, -0.6)</b> | <b>1.1 (0.7, 1.4)</b> | e, f, A                    |
| 100.1-133.0% FPL   | <b>3.8 (1.1, 9.5)</b>                               | 0.3 (-1.5, 1.8)       | <b>-2.0 (-4.3, -0.8)</b> | 0.1 (-0.8, 0.8)       | e, B                       |
| 133.1-185.0% FPL   | <b>9.0 (0.8, 15.3)</b>                              | -1.4 (-2.5, 1.3)      | <b>-1.4 (-4.3, -0.4)</b> | 0.4 (-1.1, 1.4)       | f, B                       |

Obesity is having a BMI ≥ 95<sup>th</sup> percentile of CDC's gender- and age-specific growth reference values.

FPL = Federal poverty level.

<sup>a</sup>Time periods based on the inflection years of the trend in obesity prevalence for all children.

<sup>b</sup>Average Annual Percent Change based on log-linear regression model. **Bold** AAPC (95% CI) represent statistically significant increases or decreases over the specified time period.

<sup>c</sup>p-value for test of parallelism to determine whether two secular trends are parallel, ie have common slopes. Identical lower-case letters refer to significantly different secular trends at p < 0.05. No lower-case letter means that the trends are parallel.

<sup>d</sup>p-value for test of coincidence to determine whether two secular trends are identical. Identical capital letters refer to whether two secular trends are not significantly different at p < 0.05.

**eTable 3.** Average annual percent change (AAPC) in obesity prevalence for specific time periods<sup>a</sup> by household education and child’s age: Los Angeles County, 2003-2014.

|                    | Average Annual Percent Change <sup>b</sup> (95% CI) |                       |                           |                       | Comparisons <sup>c,d</sup> |
|--------------------|-----------------------------------------------------|-----------------------|---------------------------|-----------------------|----------------------------|
|                    | 2003-05                                             | 2005-10               | 2010-14                   | 2003-14               |                            |
| <b>2-year-olds</b> |                                                     |                       |                           |                       |                            |
| < High school      | <b>10.9 (5.4, 19.5)</b>                             | 1.1 (-1.1, 2.6)       | <b>-1.2 (-3.0, 0.1)</b>   | <b>2.0 (0.9, 3.0)</b> |                            |
| High school        | <b>7.6 (4.0, 14.2)</b>                              | <b>1.9 (0.1, 3.1)</b> | <b>-1.7 (-3.4, -0.3)</b>  | <b>1.6 (0.6, 2.6)</b> |                            |
| Some college       | <b>15.7 (9.6, 20.4)</b>                             | <b>1.6 (0.3, 3.1)</b> | <b>-4.3 (-5.6, -2.8)</b>  | <b>1.8 (1.2, 2.4)</b> |                            |
| College or more    | <b>5.3 (2.1, 13.5)</b>                              | <b>3.0 (0.4, 5.9)</b> | <b>-5.5 (-10.0, -2.3)</b> | 0.2 (-1.5, 2.0)       |                            |
| <b>3-year-olds</b> |                                                     |                       |                           |                       |                            |
| < High school      | <b>10.9 (6.8, 14.1)</b>                             | 0.6 (-0.2, 1.6)       | <b>-1.5 (-3.0, -0.6)</b>  | <b>1.6 (1.0, 2.0)</b> |                            |
| High school        | <b>10.3 (6.3, 13.6)</b>                             | <b>1.2 (0.4, 2.3)</b> | <b>-1.5 (-2.7, -0.8)</b>  | <b>1.8 (1.3, 2.2)</b> |                            |
| Some college       | <b>9.6 (5.3, 16.7)</b>                              | 1.5 (-0.5, 3.0)       | <b>-4.5 (-6.5, -2.5)</b>  | 0.7 (-0.3, 1.7)       |                            |
| College or more    | 0.4 (-1.7, 2.5)                                     | 0.4 (-1.7, 2.5)       | 0.4 (-1.7, 2.5)           | 0.4 (-1.7, 2.5)       |                            |
| <b>4-year-olds</b> |                                                     |                       |                           |                       |                            |
| < High school      | <b>9.1 (4.5, 12.4)</b>                              | -0.4 (-0.9, 0.9)      | -0.4 (-1.1, 0.1)          | <b>1.3 (0.7, 1.8)</b> |                            |
| High school        | <b>6.8 (3.4, 9.7)</b>                               | 0.8 (-0.0, 1.8)       | <b>-1.5 (-2.6, -0.4)</b>  | <b>1.0 (0.5, 1.5)</b> |                            |
| Some college       | <b>3.8 (1.6, 9.4)</b>                               | 1.6 (-0.1, 3.0)       | <b>-1.6 (-3.9, -0.2)</b>  | 0.8 (-0.1, 1.7)       |                            |
| College or more    | -0.5 (-3.2, 2.0)                                    | -0.5 (-3.2, 2.0)      | -0.5 (-3.2, 2.0)          | -0.5 (-3.2, 2.0)      |                            |

Obesity is having a BMI  $\geq$  95<sup>th</sup> percentile of CDC’s gender- and age-specific growth reference values.

<sup>a</sup>Time periods based on the inflection years of the trend in obesity prevalence for all children.

<sup>b</sup>Average Annual Percent Change based on log-linear regression model. **Bold** AAPC (95% CI) represent statistically significant increases or decreases over the specified time period.

<sup>c</sup>p-value for test of parallelism to determine whether two secular trends are parallel, ie have common slopes. Identical lower-case letters refer to significantly different secular trends at p < 0.05. No lower-case letter means that the trends are parallel.

<sup>d</sup>p-value for test of coincidence to determine whether two secular trends are identical. Identical capital letters refer to whether two secular trends are not significantly different at p < 0.05.

**eTable 4.** Average annual percent change (AAPC) in obesity prevalence for specific time periods<sup>a</sup> by neighborhood median household income and child's age: Los Angeles County, 2003-2014.

|                    | Average Annual Percent Change <sup>b</sup> (95% CI) |                       |                          |                       | Comparisons <sup>c,d</sup> |
|--------------------|-----------------------------------------------------|-----------------------|--------------------------|-----------------------|----------------------------|
|                    | 2003-05                                             | 2005-10               | 2010-14                  | 2003-14               |                            |
| <b>2-year-olds</b> |                                                     |                       |                          |                       |                            |
| ≤ \$ 32,738        | <b>8.4 (4.9, 13.8)</b>                              | <b>1.7 (0.3, 2.9)</b> | <b>-2.5 (-4.3, -1.1)</b> | <b>1.3 (0.3, 2.3)</b> | A                          |
| \$32,739 - 40,278  | <b>8.1 (3.8, 18.1)</b>                              | 1.9 (-1.1, 3.9)       | <b>-2.1 (-5.4, -0.4)</b> | <b>1.5 (0.1, 2.7)</b> | A                          |
| \$40,279 - 51,534  | <b>14.0 (7.2, 20.1)</b>                             | 1.5 (-0.2, 3.3)       | <b>-3.5 (-5.7, -1.4)</b> | <b>1.8 (0.7, 2.7)</b> |                            |
| ≥ \$51,535         | <b>12.7 (6.6, 17.6)</b>                             | 1.1 (-0.4, 2.6)       | <b>-3.5 (-5.3, -1.6)</b> | <b>1.4 (0.5, 2.1)</b> |                            |
| <b>3-year-olds</b> |                                                     |                       |                          |                       |                            |
| ≤ \$ 32,738        | <b>10.2 (6.6, 13.0)</b>                             | <b>0.8 (0.2, 1.8)</b> | <b>-2.0 (-3.1, -1.3)</b> | <b>1.4 (0.9, 1.8)</b> |                            |
| \$32,739 - 40,278  | <b>14.1 (10.6, 16.6)</b>                            | 0.4 (-0.4, 1.3)       | <b>-3.3 (-4.4, -2.2)</b> | <b>1.3 (0.8, 1.8)</b> | e                          |
| \$40,279 - 51,534  | <b>12.3 (7.0, 15.9)</b>                             | 0.7 (-0.3, 2.1)       | <b>-2.5 (-4.1, -0.9)</b> | <b>1.5 (0.8, 2.2)</b> | e                          |
| ≥ \$51,535         | <b>5.4 (2.6, 10.9)</b>                              | 1.3 (-0.3, 2.3)       | -1.3 (-3.0, -0.3)        | <b>1.1 (0.3, 1.8)</b> |                            |
| <b>4-year-olds</b> |                                                     |                       |                          |                       |                            |
| ≤ \$ 32,738        | <b>8.6 (4.6, 12.1)</b>                              | 0.6 (-0.4, 1.7)       | <b>-2.2 (-3.6, -0.8)</b> | <b>1.0 (0.3, 1.5)</b> | A                          |
| \$32,739 - 40,278  | <b>9.5 (6.1, 11.9)</b>                              | 0.1 (-0.5, 1.0)       | <b>-1.7 (-2.8, -1.0)</b> | <b>1.1 (0.7, 1.4)</b> | A                          |
| \$40,279 - 51,534  | 0.3 (-0.7, 1.3)                                     | 0.3 (-0.7, 1.3)       | 0.3 (-0.7, 1.3)          | 0.3 (-0.7, 1.3)       |                            |
| ≥ \$51,535         | <b>3.9 (1.9, 8.0)</b>                               | 0.9 (-0.4, 1.8)       | <b>-1.0 (-2.2, -0.2)</b> | <b>0.8 (0.2, 1.3)</b> |                            |

Obesity is having a BMI ≥ 95<sup>th</sup> percentile of CDC's gender- and age-specific growth reference values.

<sup>a</sup>Time periods based on the inflection years of the trend in obesity prevalence for all children.

<sup>b</sup>Average Annual Percent Change based on log-linear regression model. **Bold** AAPC (95% CI) represent statistically significant increases or decreases over the specified time period.

<sup>c</sup>p-value for test of parallelism to determine whether two secular trends are parallel, ie have common slopes. Identical lower-case letters refer to significantly different secular trends at p < 0.05. No lower-case letter means that the trends are parallel.

<sup>d</sup>p-value for test of coincidence to determine whether two secular trends are identical. Identical capital letters refer to whether two secular trends are not significantly different at p < 0.05.
